# Supplementary material for: Immune Response and Transplacental Antibody Transfer in Pregnant Women after COVID-19 Vaccination
Source: MDPI journal article supplement (doi:10.3390/jpm13040689), 2023-04-20
Supplement: s1 [file s1]

Table S1. Details of all the subjects analyzed for T-cell mediated immune response

| Study ID  | Dose-Sampling Interval | Anti-N Interpretation | Anti-S Interpretation | Anti-S Interpretation | Maternal IFN- $\gamma$ | Fetal IFN- $\gamma$ |
|-----------|------------------------|-----------------------|-----------------------|-----------------------|------------------------|---------------------|
| BU120C39b | NA                     | NEG                   | NEG                   | NEG                   | NonReactive            | Indeterminate       |
| BU122C40a | NA                     | NEG                   | POS                   | POS                   | Indeterminate          | Indeterminate       |
| BU123C40b | NA                     | POS                   | NA                    | NA                    | Indeterminate          | Indeterminate       |
| BU125C41a | NA                     | NEG                   | NEG                   | NEG                   | Indeterminate          | Indeterminate       |
| BU126C41b | NA                     | NEG                   | NEG                   | NA                    | Indeterminate          | Indeterminate       |
| BU128C42a | NA                     | NEG                   | NEG                   | NEG                   | Indeterminate          | Indeterminate       |
| SA002C1a  | NA                     | NEG                   | NEG                   | NA                    | NonReactive            | NA                  |
| SA002C1b  | NA                     | NEG                   | NEG                   | NEG                   | NonReactive            | NA                  |
| SA004C2a  | NA                     | NEG                   | POS                   | NA                    | NonReactive            | NA                  |
| SA004C2b  | NA                     | NEG                   | NEG                   | NEG                   | NonReactive            | NA                  |
| SA006C3a  | NA                     | POS                   | NA                    | NA                    | NonReactive            | NA                  |
| SA006C3b  | NA                     | NEG                   | NEG                   | NA                    | Indeterminate          | NA                  |
| BU154V51  | 21                     | NEG                   | NEG                   | POS                   | Indeterminate          | Indeterminate       |
| BU157V52  | 112                    | NEG                   | POS                   | NA                    | Indeterminate          | Indeterminate       |
| BU160V53  | 79                     | NEG                   | POS                   | POS                   | Indeterminate          | NonReactive         |
| BU169V56  | 64                     | NEG                   | POS                   | POS                   | NonReactive            | Indeterminate       |
| BU172V57  | 113                    | NEG                   | POS                   | POS                   | Indeterminate          | Indeterminate       |
| BU175V58  | 285                    | POS                   | POS                   | NA                    | Indeterminate          | Indeterminate       |
| BU184V61  | NA                     | NEG                   | POS                   | NA                    | Reactive               | Indeterminate       |
| BU190V63  | 146                    | NEG                   | POS                   | POS                   | Indeterminate          | Indeterminate       |
| BU193V64  | 107                    | NEG                   | POS                   | POS                   | Indeterminate          | Indeterminate       |
| BU196V65  | 118                    | POS                   | NA                    | NA                    | NonReactive            | Indeterminate       |
| BU199V66  | 88                     | NEG                   | POS                   | POS                   | NonReactive            | Indeterminate       |
| BU202V67  | 28                     | NEG                   | POS                   | POS                   | Reactive               | Indeterminate       |
| BU205V68  | 98                     | POS                   | NA                    | NA                    | Indeterminate          | Indeterminate       |
| BU208V69  | 140                    | NEG                   | POS                   | POS                   | NonReactive            | Indeterminate       |
| BU211V70  | 102                    | NEG                   | POS                   | POS                   | NonReactive            | Indeterminate       |
| BU213V71  | 133                    | NEG                   | POS                   | POS                   | NonReactive            | Indeterminate       |
| SA001V1   | NA                     | NEG                   | POS                   | NA                    | Indeterminate          | NA                  |
| SA003V2   | 1                      | POS                   | NA                    | NA                    | NonReactive            | NA                  |
| SA005V3   | 119                    | NEG                   | POS                   | NA                    | NonReactive            | NA                  |
| SA007V4   | NA                     | NEG                   | POS                   | POS                   | Reactive               | NA                  |
| SA009V5   | NA                     | NEG                   | POS                   | POS                   | NonReactive            | NA                  |
| SA011V6   | 58                     | NEG                   | POS                   | NA                    | NonReactive            | NA                  |
| SA013V7   | 12                     | NEG                   | POS                   | POS                   | Reactive               | NA                  |
